# Supplementary material for: Cellular Repair of DNA–DNA Cross-Links Induced by 1,2,3,4-Diepoxybutane
Source: PubMed Central journal article supplement (PMC5454995; doi:10.3390/ijms18051086), 2017-05-18
Supplement: ijms-18-01086-s001.pdf [file ijms-18-01086-s001.pdf]

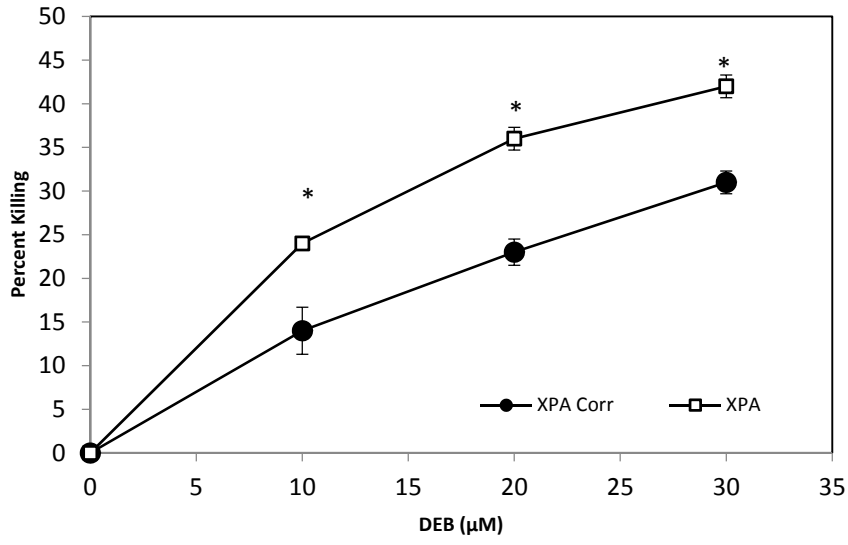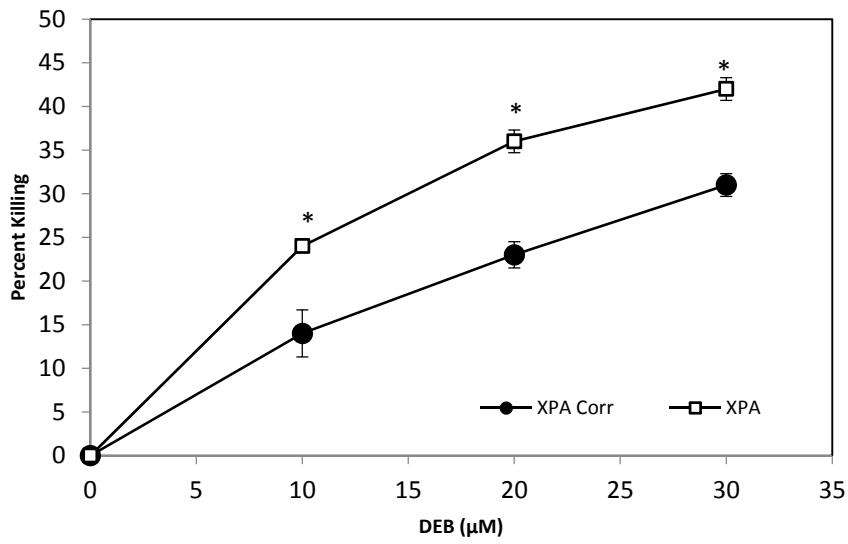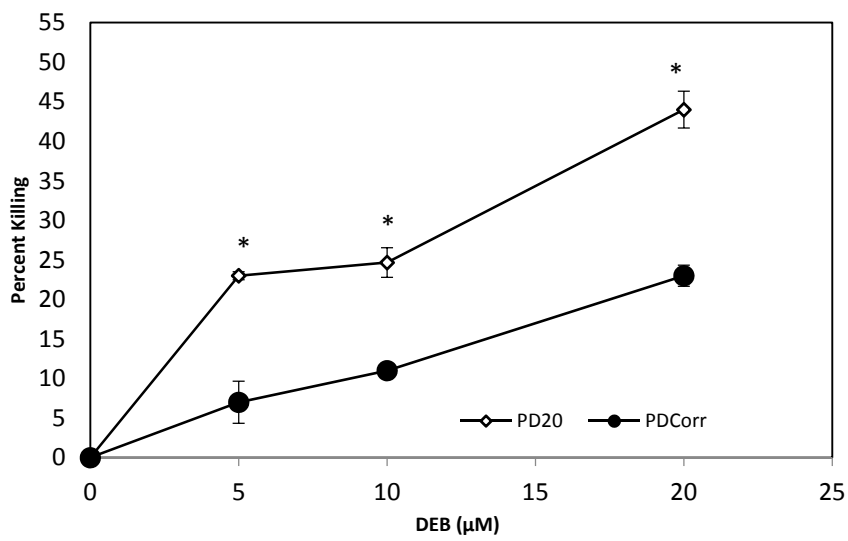

Figure S1. Effects of exposure to DEB on cell death of human wild-type (circles), XPA (squares) and PD20 (diamonds) cells. The influence of exposure to various concentrations of DEB for 3 h on cell survival was determined through direct cell counting of trypan blue-excluding cells as described in the Methods section. Results represent average  $\pm$  the standard error of the mean, N= 3 or more \*P<0.05.

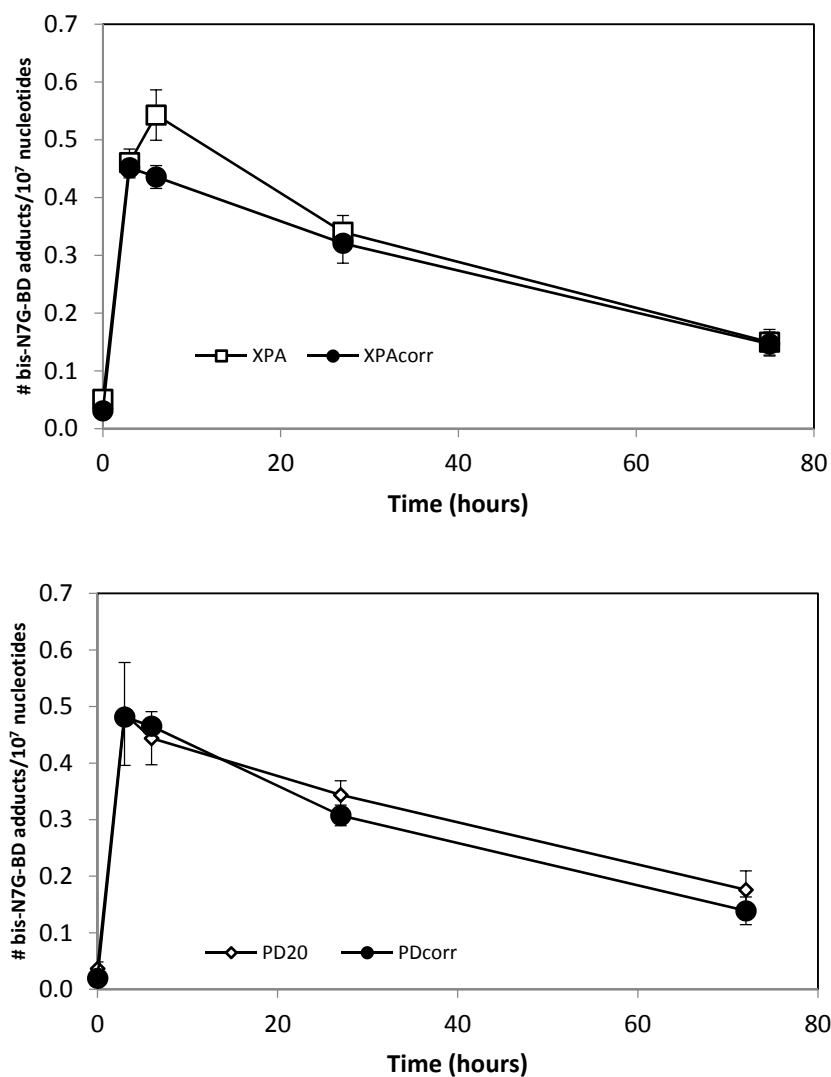

Figure S2. Time course for the formation and removal of *bis*-N7G-BD cross-links in human wild-type (circles), XPA (squares), and cells PD20 (diamonds). Cells were exposed to 15  $\mu$ M DEB for 3 hours and then replaced with fresh growth media. Chromosomal DNA was isolated at the indicated times and *bis*-N7G-BD adduct levels were quantified by HPLC-ESI<sup>+</sup>-MS/MS as described in the Methods section. Results represent average  $\pm$  the SEM, N=3.
